# Supplementary material
Source: publisher figshare collection journal article supplement (https://frontiersin.figshare.com/ndownloader/files/13269359)
Supplement: Supplementary file [file 13269359]

**Table S10 Epistatic effects and environmental interactions detected for fiber quality traits in IF<sub>2</sub>MPH, HSBCF<sub>1</sub>MPH, and MARBCF<sub>1</sub>MPH datasets by ICIM method**

| Traits <sup>a</sup>  | e-QTL       | Type of epistasis <sup>b</sup> | Chr.i <sup>c</sup> | Position1 <sup>d</sup> | Flanking markers 1 <sup>e</sup> | Chr.j <sup>c</sup> | Position2 <sup>d</sup> | Flanking markers 2 <sup>e</sup> | LOD <sup>f</sup> | PV <sup>g</sup> | PV(AA) <sup>g</sup> | PV(AAE) <sup>g</sup> |
|----------------------|-------------|--------------------------------|--------------------|------------------------|---------------------------------|--------------------|------------------------|---------------------------------|------------------|-----------------|---------------------|----------------------|
| IF <sub>2</sub> MPHs |             |                                |                    |                        |                                 |                    |                        |                                 |                  |                 |                     |                      |
| FL                   | IMmeq-FL-1  | III                            | 4                  | 20                     | i00135Gh-i47058Gh               | 5                  | 30                     | i53001Gb-i08984Gh               | 8.0367           | 4.3004          | 2.7548              | 1.5455               |
|                      | IMmeq-FL-2  | III                            | 5                  | 10                     | i38565Gh-i36865Gh               | 5                  | 30                     | i53001Gb-i08984Gh               | 8.4539           | 4.6559          | 2.5539              | 2.102                |
|                      | IMmeq-FL-3  | III                            | 5                  | 30                     | i53001Gb-i08984Gh               | 8                  | 5                      | i31145Gh-i40270Gh               | 9.086            | 5.1156          | 2.1151              | 3.0006               |
|                      | IMmeq-FL-4  | III                            | 5                  | 30                     | i53001Gb-i08984Gh               | 9                  | 45                     | i46552Gh-i24387Gh               | 8.413            | 4.4599          | 2.1927              | 2.2671               |
|                      | IMmeq-FL-5  | III                            | 5                  | 30                     | i53001Gb-i08984Gh               | 11                 | 35                     | i40251Gh-i07190Gh               | 9.608            | 5.2064          | 2.7167              | 2.4897               |
|                      | IMmeq-FL-6  | III                            | 7                  | 10                     | i24917Gh-i26814Gh               | 13                 | 35                     | i37089Gh-i41278Gh               | 9.9599           | 4.8661          | 2.0843              | 2.7819               |
|                      | IMmeq-FL-7  | III                            | 9                  | 15                     | i40336Gh-i07864Gh               | 15                 | 30                     | i02459Gh-i02486Gh               | 8.2177           | 4.2355          | 3.6856              | 0.5499               |
|                      | IMmeq-FL-8  | III                            | 5                  | 30                     | i53001Gb-i08984Gh               | 15                 | 40                     | i02315Gh-i07215Gh               | 8.6124           | 4.2597          | 2.2591              | 2.0006               |
|                      | IMmeq-FL-9  | III                            | 10                 | 15                     | i25267Gh-i30274Gh               | 18                 | 15                     | i31442Gh-i13146Gh               | 8.1758           | 4.2546          | 0.5408              | 3.7138               |
|                      | IMmeq-FL-10 | III                            | 4                  | 0                      | i50068Gb-i26515Gh               | 20                 | 40                     | i37554Gh-i47006Gh               | 8.1359           | 3.7949          | 2.3398              | 1.4551               |
|                      | IMmeq-FL-11 | III                            | 18                 | 15                     | i31442Gh-i13146Gh               | 20                 | 40                     | i37554Gh-i47006Gh               | 8.9896           | 4.3877          | 2.211               | 2.1767               |
|                      | IMmeq-FL-12 | III                            | 21                 | 25                     | i22367Gh-i47711Gh               | 21                 | 50                     | i35971Gh-i47631Gh               | 8.1939           | 2.9013          | 2.6074              | 0.2939               |
|                      | IMmeq-FL-13 | III                            | 5                  | 30                     | i53001Gb-i08984Gh               | 22                 | 25                     | i12539Gh-i12581Gh               | 8.603            | 3.8589          | 2.1485              | 1.7104               |
|                      | IMmeq-FL-14 | III                            | 21                 | 60                     | i22642Gh-i41613Gh               | 22                 | 45                     | i44682Gh-i25111Gh               | 8.5442           | 3.7811          | 1.8219              | 1.9592               |
|                      | IMmeq-FL-15 | III                            | 8                  | 20                     | i25482Gh-i25868Gh               | 24                 | 55                     | i14999Gh-i14993Gh               | 8.0507           | 4.1593          | 1.8865              | 2.2728               |
|                      | IMmeq-FL-16 | III                            | 21                 | 50                     | i35971Gh-i47631Gh               | 25                 | 50                     | i40453Gh-i46187Gh               | 8.9778           | 4.292           | 1.0059              | 3.2861               |
|                      | IMmeq-FL-17 | III                            | 5                  | 30                     | i53001Gb-i08984Gh               | 25                 | 55                     | i11287Gh-i17145Gh               | 8.579            | 3.7994          | 1.3904              | 2.409                |
|                      | IMmeq-FL-18 | III                            | 14                 | 85                     | i05035Gh-i22015Gh               | 26                 | 10                     | i33827Gh-i25834Gh               | 11.3347          | 5.9649          | 4.1147              | 1.8502               |
|                      | IMmeq-FL-19 | III                            | 20                 | 5                      | i00478Gh-i11539Gh               | 26                 | 10                     | i33827Gh-i25834Gh               | 9.0765           | 4.2962          | 3.041               | 1.2552               |
| FU                   | IMmeq-FU-1  | III                            | 7                  | 65                     | i14398Gh-i01824Gh               | 9                  | 80                     | i47965Gh-i03487Gh               | 8.3777           | 3.3123          | 0.4973              | 2.815                |
|                      | IMmeq-FU-2  | III                            | 5                  | 40                     | i08988Gh-i45534Gh               | 12                 | 0                      | i40974Gh-i48211Gh               | 12.5721          | 2.2914          | 0.3011              | 1.9903               |
|                      | IMmeq-FU-3  | III                            | 9                  | 5                      | i25689Gh-i17373Gh               | 14                 | 25                     | i15375Gh-i05040Gh               | 8.3126           | 3.5892          | 0.0668              | 3.5223               |
|                      | IMmeq-FU-4  | III                            | 9                  | 75                     | i05825Gh-i14639Gh               | 15                 | 0                      | i02955Gh-i02314Gh               | 8.5626           | 3.9913          | 0.7365              | 3.2548               |

|     |             |     |    |    |                   |    |    |                   |         |        |        |        |
|-----|-------------|-----|----|----|-------------------|----|----|-------------------|---------|--------|--------|--------|
| MIC | IMmeq-FU-5  | III | 12 | 0  | i40974Gh-i48211Gh | 19 | 20 | i08987Gh-i09220Gh | 8.405   | 2.1434 | 0.4457 | 1.6977 |
|     | IMmeq-FU-6  | III | 5  | 65 | i37142Gh-i48326Gh | 20 | 5  | i00478Gh-i11539Gh | 8.153   | 3.9091 | 0.8117 | 3.0974 |
|     | IMmeq-FU-7  | III | 11 | 0  | i52789Gb-i07420Gh | 20 | 5  | i00478Gh-i11539Gh | 9.0226  | 1.8465 | 1.0817 | 0.7647 |
|     | IMmeq-FU-8  | III | 8  | 20 | i25482Gh-i25868Gh | 22 | 50 | i44682Gh-i25111Gh | 8.4857  | 3.3596 | 0.27   | 3.0896 |
|     | IMmeq-FU-9  | III | 20 | 40 | i37554Gh-i47006Gh | 24 | 10 | i04567Gh-i15176Gh | 8.4672  | 4.2347 | 0.4207 | 3.8139 |
|     | IMmeq-FU-10 | III | 23 | 0  | i06287Gh-i06171Gh | 25 | 20 | i41210Gh-i42629Gh | 8.1712  | 4.6046 | 1.1626 | 3.442  |
|     | IMmeq-FU-11 | III | 14 | 25 | i15375Gh-i05040Gh | 25 | 25 | i27022Gh-i11449Gh | 9.6489  | 4.4223 | 0.9671 | 3.4552 |
|     | IMmeq-FU-12 | III | 20 | 40 | i37554Gh-i47006Gh | 26 | 10 | i33827Gh-i25834Gh | 8.6265  | 3.5233 | 0.4931 | 3.0302 |
|     | IMmeq-MIC-1 | III | 3  | 95 | i42939Gh-i05394Gh | 5  | 40 | i08988Gh-i45534Gh | 13.0563 | 2.0999 | 1.415  | 0.6849 |
|     | IMmeq-MIC-2 | III | 21 | 10 | i06952Gh-i07714Gh | 21 | 45 | i07446Gh-i16079Gh | 8.9765  | 0.1563 | 0.1432 | 0.0132 |
| FE  | IMmeq-FE-1  | III | 1  | 35 | i02298Gh-i42430Gh | 1  | 50 | i31438Gh-i26341Gh | 12.175  | 0.0188 | 1.798  | 0      |
|     | IMmeq-FE-2  | III | 4  | 30 | i10502Gh-i36496Gh | 7  | 45 | i35445Gh-i13943Gh | 9.571   | 0.0257 | 0.1682 | 1.2248 |
|     | IMmeq-FE-3  | III | 4  | 5  | i26515Gh-i43091Gh | 8  | 15 | i04570Gh-i04506Gh | 13.4406 | 0.0361 | 0.0074 | 0.0556 |
|     | IMmeq-FE-4  | III | 1  | 50 | i31438Gh-i26341Gh | 10 | 65 | i22625Gh-i22107Gh | 12.9022 | 0.0629 | 0.0636 | 0.7096 |
|     | IMmeq-FE-5  | III | 11 | 15 | i01036Gh-i07468Gh | 11 | 25 | i07163Gh-i56975Gb | 8.7282  | 0.0753 | 0.0589 | 0.3197 |
|     | IMmeq-FE-6  | III | 3  | 35 | i27670Gh-i40392Gh | 14 | 30 | i35260Gh-i35101Gh | 8.8051  | 0.0815 | 0.0897 | 0.298  |
|     | IMmeq-FE-7  | III | 11 | 25 | i07163Gh-i56975Gb | 14 | 65 | i05772Gh-i05775Gh | 12.4416 | 0.1288 | 0.0207 | 0.159  |
|     | IMmeq-FE-8  | III | 10 | 65 | i22625Gh-i22107Gh | 14 | 70 | i38712Gh-i23682Gh | 12.311  | 0.1734 | 0.2302 | 0.8458 |
|     | IMmeq-FE-9  | III | 9  | 10 | i05758Gh-i19700Gh | 16 | 5  | i31225Gh-i35502Gh | 14.3055 | 0.1797 | 0.1259 | 0.1789 |
|     | IMmeq-FE-10 | III | 3  | 5  | i34758Gh-i49377Gh | 17 | 5  | i03245Gh-i46085Gh | 9.379   | 0.2681 | 0.1288 | 0      |
|     | IMmeq-FE-11 | III | 9  | 10 | i05758Gh-i19700Gh | 17 | 25 | i03512Gh-i22912Gh | 8.9617  | 0.3048 | 0.3886 | 1.1576 |
|     | IMmeq-FE-12 | III | 11 | 25 | i07163Gh-i56975Gb | 17 | 40 | i03508Gh-i18575Gh | 12.7024 | 0.3737 | 2.5308 | 4.7974 |
|     | IMmeq-FE-13 | III | 18 | 55 | i13319Gh-i42821Gh | 19 | 35 | i50235Gb-i52709Gb | 10.7117 | 0.3786 | 0.0319 | 0.1415 |
|     | IMmeq-FE-14 | III | 13 | 55 | i21560Gh-i46408Gh | 20 | 55 | i12251Gh-i11715Gh | 8.7963  | 0.3878 | 0.8046 | 1.1141 |
|     | IMmeq-FE-15 | III | 4  | 0  | i50068Gb-i26515Gh | 21 | 45 | i07446Gh-i16079Gh | 10.7733 | 0.4359 | 0.1416 | 0.2943 |
|     | IMmeq-FE-16 | III | 12 | 50 | i08275Gh-i16368Gh | 22 | 15 | i43141Gh-i60448Gb | 12.778  | 0.7732 | 0.0361 | 0      |

|    |             |     |    |    |                   |    |    |                   |         |        |        |        |
|----|-------------|-----|----|----|-------------------|----|----|-------------------|---------|--------|--------|--------|
|    | IMmeq-FE-17 | III | 18 | 50 | i13451Gh-i38577Gh | 22 | 15 | i43141Gh-i60448Gb | 11.7239 | 1.076  | 0.3643 | 0.0094 |
|    | IMmeq-FE-18 | III | 4  | 5  | i26515Gh-i43091Gh | 23 | 25 | i06171Gh-i06175Gh | 11.9549 | 1.0817 | 0.0058 | 0.013  |
|    | IMmeq-FE-19 | III | 12 | 50 | i08275Gh-i16368Gh | 23 | 30 | i26750Gh-i31332Gh | 12.8861 | 1.393  | 0.0753 | 0      |
|    | IMmeq-FE-20 | III | 20 | 55 | i12251Gh-i11715Gh | 24 | 50 | i38401Gh-i04575Gh | 9.9101  | 1.5461 | 0.2882 | 0.7935 |
|    | IMmeq-FE-21 | III | 23 | 30 | i26750Gh-i31332Gh | 24 | 50 | i38401Gh-i04575Gh | 12.8461 | 1.798  | 0.0051 | 0.0206 |
|    | IMmeq-FE-22 | III | 4  | 30 | i10502Gh-i36496Gh | 24 | 65 | i03764Gh-i03721Gh | 8.3015  | 1.9187 | 0.2538 | 0.0144 |
|    | IMmeq-FE-23 | III | 15 | 5  | i02306Gh-i02317Gh | 25 | 25 | i27022Gh-i11449Gh | 8.477   | 4.6756 | 2.1374 | 2.5381 |
|    | IMmeq-FE-24 | III | 1  | 0  | i33646Gh-i40884Gh | 26 | 15 | i25512Gh-i07941Gh | 8.7028  | 5.4793 | 1.7728 | 3.7065 |
|    | IMmeq-FE-25 | III | 16 | 45 | i54957Gb-i59324Gb | 26 | 50 | i16464Gh-i28856Gh | 9.9639  | 7.3282 | 0.0081 | 0.0735 |
| FS | IMmeq-FS-1  | III | 2  | 0  | i17680Gh-i02755Gh | 3  | 75 | i43226Gh-i45963Gh | 9.9921  | 4.7875 | 2.381  | 2.4065 |
|    | IMmeq-FS-2  | III | 5  | 40 | i08988Gh-i45534Gh | 17 | 45 | i00956Gh-i42547Gh | 10.2578 | 0.5764 | 0.0871 | 0.4893 |
|    | IMmeq-FS-3  | III | 4  | 0  | i50068Gb-i26515Gh | 18 | 40 | i26970Gh-i39369Gh | 8.4703  | 4.6971 | 1.9117 | 2.7854 |
|    | IMmeq-FS-4  | III | 9  | 45 | i46552Gh-i24387Gh | 20 | 10 | i39228Gh-i34769Gh | 8.7761  | 4.1116 | 2.0121 | 2.0995 |

#### HSBCF<sub>1</sub>MPHs

|    |                          |     |    |    |                   |    |    |                   |         |        |        |        |
|----|--------------------------|-----|----|----|-------------------|----|----|-------------------|---------|--------|--------|--------|
| FL | B <sub>1</sub> Mmeq-FL-1 | III | 2  | 75 | i02276Gh-i43470Gh | 14 | 15 | i15343Gh-i31037Gh | 8.31    | 2.9721 | 2.843  | 0.129  |
|    | B <sub>1</sub> Mmeq-FL-2 | III | 2  | 85 | i38985Gh-i30800Gh | 15 | 5  | i02306Gh-i02317Gh | 6.1571  | 2.0034 | 1.161  | 0.8424 |
|    | B <sub>1</sub> Mmeq-FL-3 | III | 14 | 10 | i46775Gh-i43468Gh | 15 | 35 | i17844Gh-i37620Gh | 6.7396  | 2.253  | 2.0099 | 0.2431 |
|    | B <sub>1</sub> Mmeq-FL-4 | III | 15 | 25 | i18410Gh-i38002Gh | 19 | 5  | i16591Gh-i08933Gh | 6.0457  | 2.2133 | 1.8609 | 0.3524 |
|    | B <sub>1</sub> Mmeq-FL-5 | III | 11 | 0  | i52789Gb-i07420Gh | 19 | 15 | i28797Gh-i09073Gh | 7.5057  | 2.7022 | 2.5407 | 0.1615 |
|    | B <sub>1</sub> Mmeq-FL-6 | III | 6  | 15 | i19214Gh-i31843Gh | 20 | 20 | i26356Gh-i11706Gh | 6.2072  | 2.3137 | 2.2736 | 0.0401 |
|    | B <sub>1</sub> Mmeq-FL-7 | III | 7  | 10 | i24917Gh-i26814Gh | 26 | 5  | i08062Gh-i33827Gh | 6.0204  | 2.2817 | 1.4635 | 0.8182 |
| FU | B <sub>1</sub> Mmeq-FU-1 | III | 2  | 70 | i00890Gh-i02271Gh | 4  | 30 | i10502Gh-i36496Gh | 9.4664  | 3.5265 | 1.4195 | 2.1069 |
|    | B <sub>1</sub> Mmeq-FU-2 | III | 4  | 30 | i10502Gh-i36496Gh | 6  | 45 | i23722Gh-i37862Gh | 8.0676  | 3.4883 | 0.8042 | 2.6841 |
|    | B <sub>1</sub> Mmeq-FU-3 | III | 7  | 0  | i32739Gh-i37773Gh | 7  | 10 | i24917Gh-i26814Gh | 10.7565 | 0.7124 | 0.7124 | 0      |
|    | B <sub>1</sub> Mmeq-FU-4 | III | 4  | 30 | i10502Gh-i36496Gh | 9  | 5  | i25689Gh-i17373Gh | 8.2439  | 2.8229 | 1.2525 | 1.5704 |
|    | B <sub>1</sub> Mmeq-FU-5 | III | 4  | 30 | i10502Gh-i36496Gh | 13 | 55 | i21560Gh-i46408Gh | 8.4394  | 4.6434 | 1.3016 | 3.3418 |

|     |                           |     |    |    |                   |    |     |                   |         |        |        |        |
|-----|---------------------------|-----|----|----|-------------------|----|-----|-------------------|---------|--------|--------|--------|
| MIC | B <sub>1</sub> Mmeq-FU-6  | III | 4  | 30 | i10502Gh-i36496Gh | 14 | 35  | i04933Gh-i43400Gh | 12.3256 | 6.7366 | 1.9991 | 4.7375 |
|     | B <sub>1</sub> Mmeq-FU-7  | III | 6  | 45 | i23722Gh-i37862Gh | 14 | 35  | i04933Gh-i43400Gh | 8.5222  | 2.3481 | 0.6989 | 1.6493 |
|     | B <sub>1</sub> Mmeq-FU-8  | III | 14 | 35 | i04933Gh-i43400Gh | 16 | 15  | i14406Gh-i01766Gh | 8.9274  | 2.8336 | 1.4495 | 1.3841 |
|     | B <sub>1</sub> Mmeq-FU-9  | III | 4  | 30 | i10502Gh-i36496Gh | 16 | 45  | i54957Gb-i59324Gb | 8.3538  | 5.6999 | 1.5286 | 4.1712 |
|     | B <sub>1</sub> Mmeq-FU-10 | III | 6  | 45 | i23722Gh-i37862Gh | 16 | 50  | i46435Gh-i58367Gb | 11.8929 | 3.5126 | 1.0037 | 2.5088 |
|     | B <sub>1</sub> Mmeq-FU-11 | III | 4  | 30 | i10502Gh-i36496Gh | 18 | 105 | i45991Gh-i13081Gh | 12.05   | 4.7116 | 2.0707 | 2.6408 |
|     | B <sub>1</sub> Mmeq-FU-12 | III | 6  | 55 | i06396Gh-i06056Gh | 22 | 30  | i12906Gh-i17853Gh | 8.3417  | 3.9572 | 1.5389 | 2.4183 |
|     | B <sub>1</sub> Mmeq-FU-13 | III | 13 | 55 | i21560Gh-i46408Gh | 22 | 30  | i12906Gh-i17853Gh | 8.5081  | 4.5646 | 1.5302 | 3.0345 |
|     | B <sub>1</sub> Mmeq-FU-14 | III | 14 | 35 | i04933Gh-i43400Gh | 22 | 30  | i12906Gh-i17853Gh | 12.0793 | 7.7982 | 1.7383 | 6.0599 |
|     | B <sub>1</sub> Mmeq-FU-15 | III | 18 | 35 | i32883Gh-i13851Gh | 22 | 30  | i12906Gh-i17853Gh | 10.0649 | 5.361  | 1.5506 | 3.8104 |
|     | B <sub>1</sub> Mmeq-FU-16 | III | 19 | 30 | i16566Gh-i08941Gh | 22 | 30  | i12906Gh-i17853Gh | 10.0845 | 1.9278 | 0.8276 | 1.1002 |
|     | B <sub>1</sub> Mmeq-FU-17 | III | 4  | 30 | i10502Gh-i36496Gh | 24 | 30  | i15200Gh-i04548Gh | 10.0671 | 3.7326 | 1.4692 | 2.2634 |
|     | B <sub>1</sub> Mmeq-FU-18 | III | 22 | 30 | i12906Gh-i17853Gh | 24 | 35  | i04535Gh-i04423Gh | 11.801  | 4.6287 | 1.3449 | 3.2837 |
|     | B <sub>1</sub> Mmeq-MIC-1 | III | 5  | 10 | i38565Gh-i36865Gh | 8  | 30  | i54149Gb-i00217Gh | 6.5679  | 1.9684 | 1.6094 | 0.359  |
|     | B <sub>1</sub> Mmeq-MIC-2 | III | 10 | 50 | i33011Gh-i22938Gh | 10 | 65  | i22625Gh-i22107Gh | 6.4213  | 1.3198 | 1.3198 | 0      |
|     | B <sub>1</sub> Mmeq-MIC-3 | III | 14 | 10 | i46775Gh-i43468Gh | 25 | 5   | i00735Gh-i41210Gh | 7.7078  | 1.5874 | 1.1696 | 0.4178 |
|     | B <sub>1</sub> Mmeq-MIC-4 | III | 16 | 35 | i01640Gh-i00384Gh | 25 | 5   | i00735Gh-i41210Gh | 6.6601  | 2.7659 | 1.7476 | 1.0182 |
|     | B <sub>1</sub> Mmeq-MIC-5 | III | 21 | 40 | i07558Gh-i07515Gh | 25 | 5   | i00735Gh-i41210Gh | 6.7951  | 0.8517 | 0.7917 | 0.06   |
| FE  | B <sub>1</sub> Mmeq-MIC-6 | III | 25 | 5  | i00735Gh-i41210Gh | 25 | 60  | i17145Gh-i10628Gh | 6.2774  | 1.5845 | 1.1465 | 0.438  |
|     | B <sub>1</sub> Mmeq-MIC-7 | III | 25 | 5  | i00735Gh-i41210Gh | 26 | 40  | i36067Gh-i08578Gh | 7.5683  | 0.9544 | 0.9544 | 0      |
|     | B <sub>1</sub> Mmeq-FE-1  | III | 1  | 25 | i14664Gh-i02994Gh | 3  | 5   | i34758Gh-i49377Gh | 6.3922  | 3.0464 | 1.4127 | 1.6337 |
|     | B <sub>1</sub> Mmeq-FE-2  | III | 3  | 5  | i34758Gh-i49377Gh | 18 | 50  | i13451Gh-i38577Gh | 6.2784  | 2.52   | 1.1401 | 1.3799 |
| FS  | B <sub>1</sub> Mmeq-FE-3  | III | 22 | 20 | i12927Gh-i12929Gh | 22 | 30  | i12906Gh-i17853Gh | 6.2861  | 0.6442 | 0.6442 | 0      |
|     | B <sub>1</sub> Mmeq-FE-4  | III | 3  | 30 | i00583Gh-i27670Gh | 23 | 0   | i06287Gh-i06171Gh | 6.6031  | 1.6711 | 0.9352 | 0.7359 |
|     | B <sub>1</sub> Mmeq-FS-1  | III | 3  | 65 | i49177Gh-i39896Gh | 10 | 60  | i00538Gh-i22625Gh | 6.8075  | 2.6816 | 2.5122 | 0.1694 |
|     | B <sub>1</sub> Mmeq-FS-2  | III | 8  | 20 | i25482Gh-i25868Gh | 13 | 40  | i46668Gh-i00187Gh | 6.8041  | 2.8153 | 2.492  | 0.3233 |

| MARBCF <sub>1</sub> MPHs |                            |     |    |    |                   |    |    |                   |        |        |        |        |
|--------------------------|----------------------------|-----|----|----|-------------------|----|----|-------------------|--------|--------|--------|--------|
| FL                       | B <sub>2</sub> Mmeq-FL-1   | III | 5  | 65 | i37142Gh-i48326Gh | 7  | 10 | i24917Gh-i26814Gh | 6.8701 | 2.8336 | 1.9991 | 0.8345 |
|                          | B <sub>2</sub> Mmeq-FL-2   | III | 7  | 10 | i24917Gh-i26814Gh | 9  | 0  | i40221Gh-i15598Gh | 6.127  | 2.7028 | 2.2783 | 0.4245 |
|                          | B <sub>2</sub> Mmeq-FL-3   | III | 4  | 30 | i10502Gh-i36496Gh | 9  | 40 | i10438Gh-i08573Gh | 6.9193 | 2.8432 | 2.6556 | 0.1876 |
|                          | B <sub>2</sub> Mmeq-FL-4   | III | 8  | 45 | i04524Gh-i01126Gh | 9  | 90 | i13502Gh-i25039Gh | 6.2454 | 3.0788 | 2.7213 | 0.3575 |
|                          | B <sub>2</sub> Mmeq-FL-5   | III | 14 | 45 | i27231Gh-i36385Gh | 14 | 55 | i23629Gh-i15587Gh | 6.368  | 2.8174 | 2.2717 | 0.5457 |
|                          | B <sub>2</sub> Mmeq-FL-6   | III | 13 | 40 | i46668Gh-i00187Gh | 15 | 15 | i02469Gh-i46030Gh | 6.5099 | 2.8127 | 2.5276 | 0.285  |
|                          | B <sub>2</sub> Mmeq-FL-7   | III | 4  | 30 | i10502Gh-i36496Gh | 17 | 35 | i03218Gh-i03216Gh | 6.7952 | 3.0926 | 2.8755 | 0.2171 |
|                          | B <sub>2</sub> Mmeq-FL-8   | III | 3  | 10 | i32361Gh-i00583Gh | 21 | 65 | i22642Gh-i41613Gh | 6.3459 | 2.9229 | 2.5671 | 0.3558 |
|                          | B <sub>2</sub> Mmeq-FL-9   | III | 2  | 25 | i02761Gh-i02712Gh | 24 | 50 | i38401Gh-i04575Gh | 6.7864 | 2.976  | 2.1636 | 0.8124 |
|                          | B <sub>2</sub> Mmeq-FL-10  | III | 5  | 40 | i08988Gh-i45534Gh | 24 | 50 | i38401Gh-i04575Gh | 6.2768 | 2.4087 | 1.631  | 0.7776 |
|                          | B <sub>2</sub> Mmeq-FL-11  | III | 16 | 45 | i54957Gb-i59324Gb | 24 | 50 | i38401Gh-i04575Gh | 6.4606 | 2.8911 | 2.669  | 0.2221 |
|                          | B <sub>2</sub> Mmeq-FL-12  | III | 10 | 60 | i00538Gh-i22625Gh | 26 | 25 | i08562Gh-i49188Gh | 6.2567 | 2.2239 | 1.6768 | 0.5471 |
| FU                       | B <sub>2</sub> Mmeq-FU-1   | III | 24 | 45 | i26213Gh-i00339Gh | 25 | 50 | i40453Gh-i46187Gh | 6.4138 | 2.613  | 0.8112 | 1.8018 |
| MIC                      | B <sub>2</sub> Mmeq-MIC-1  | III | 1  | 15 | i02201Gh-i27043Gh | 9  | 10 | i05758Gh-i19700Gh | 7.0587 | 2.2812 | 1.3183 | 0.9629 |
|                          | B <sub>2</sub> Mmeq-MIC-2  | III | 3  | 65 | i49177Gh-i39896Gh | 11 | 20 | i36064Gh-i44818Gh | 8.4532 | 3.7858 | 2.9575 | 0.8283 |
|                          | B <sub>2</sub> Mmeq-MIC-3  | III | 9  | 0  | i40221Gh-i15598Gh | 17 | 30 | i14920Gh-i51624Gb | 6.3298 | 1.8615 | 1.1828 | 0.6787 |
|                          | B <sub>2</sub> Mmeq-MIC-4  | III | 2  | 90 | i07717Gh-i09654Gh | 19 | 5  | i16591Gh-i08933Gh | 6.3251 | 2.5429 | 2.2878 | 0.2551 |
|                          | B <sub>2</sub> Mmeq-MIC-5  | III | 8  | 10 | i24295Gh-i00234Gh | 19 | 5  | i16591Gh-i08933Gh | 6.3496 | 2.6471 | 1.8656 | 0.7816 |
|                          | B <sub>2</sub> Mmeq-MIC-6  | III | 18 | 5  | i13754Gh-i13145Gh | 19 | 5  | i16591Gh-i08933Gh | 6.0061 | 2.1131 | 1.9654 | 0.1477 |
|                          | B <sub>2</sub> Mmeq-MIC-7  | III | 5  | 30 | i53001Gb-i08984Gh | 20 | 0  | i17414Gh-i17417Gh | 6.597  | 3.3202 | 2.3518 | 0.9685 |
|                          | B <sub>2</sub> Mmeq-MIC-8  | III | 14 | 15 | i15343Gh-i31037Gh | 20 | 35 | i40942Gh-i35292Gh | 6.8981 | 3.2302 | 1.0296 | 2.2007 |
|                          | B <sub>2</sub> Mmeq-MIC-9  | III | 19 | 0  | i09067Gh-i09082Gh | 21 | 30 | i47711Gh-i07558Gh | 6.544  | 2.072  | 1.8443 | 0.2277 |
|                          | B <sub>2</sub> Mmeq-MIC-10 | III | 14 | 30 | i35260Gh-i35101Gh | 25 | 10 | i00735Gh-i41210Gh | 6.9535 | 2.7234 | 0.7719 | 1.9514 |
|                          | B <sub>2</sub> Mmeq-MIC-11 | III | 17 | 40 | i03508Gh-i18575Gh | 25 | 10 | i00735Gh-i41210Gh | 6.0813 | 2.7761 | 2.5151 | 0.2609 |
|                          | B <sub>2</sub> Mmeq-MIC-12 | III | 3  | 60 | i35903Gh-i20966Gh | 26 | 15 | i25512Gh-i07941Gh | 6.3804 | 3.344  | 2.7829 | 0.5611 |

|    |                          |     |    |    |                   |    |    |                   |        |        |        |        |
|----|--------------------------|-----|----|----|-------------------|----|----|-------------------|--------|--------|--------|--------|
| FE | B <sub>2</sub> Mmeq-FE-1 | III | 2  | 75 | i02276Gh-i43470Gh | 14 | 60 | i26838Gh-i01129Gh | 8.2751 | 3.3932 | 1.5325 | 1.8606 |
|    | B <sub>2</sub> Mmeq-FE-2 | III | 5  | 30 | i53001Gb-i08984Gh | 14 | 60 | i26838Gh-i01129Gh | 6.7615 | 3.3714 | 1.4121 | 1.9593 |
|    | B <sub>2</sub> Mmeq-FE-3 | III | 12 | 15 | i40974Gh-i48211Gh | 14 | 60 | i26838Gh-i01129Gh | 7.9597 | 3.2229 | 1.3061 | 1.9168 |
|    | B <sub>2</sub> Mmeq-FE-4 | III | 10 | 50 | i33011Gh-i22938Gh | 15 | 5  | i02306Gh-i02317Gh | 7.0991 | 3.1367 | 1.1673 | 1.9694 |
|    | B <sub>2</sub> Mmeq-FE-5 | III | 5  | 40 | i08988Gh-i45534Gh | 24 | 50 | i38401Gh-i04575Gh | 6.0952 | 3.3757 | 1.1204 | 2.2554 |
| FS | B <sub>2</sub> Mmeq-FS-1 | III | 8  | 30 | i54149Gb-i00217Gh | 10 | 0  | i43940Gh-i25267Gh | 6.0881 | 2.3392 | 0.4182 | 1.921  |

<sup>a</sup> FL: fiber length; FU: fiber uniformity; MIC: micronaire; FE: fiber elongation; FS: fiber strength

<sup>b</sup> Type of epistasis: (I) two loci with m-QTL, (II) one loci with m-QTL and the other loci without significant m-QTL and (III) two loci without significant m-QTL

<sup>c</sup> Chi and Chj represent the chromosome number of the loci being tested in the analysis

<sup>d</sup> Position of e-QTL located on chromosome: as cM distance from the top of each chromosome

<sup>e</sup> Flanking markers in bold are those flanking m-QTLs identified by ICIM in additional Table S8

<sup>f</sup> A LOD threshold was used for declaration of QTL based on 1000 permutations at as significance level of 0.01

<sup>g</sup> PV: the phenotypic variation that the total epistasis effect explained; PV(AA): the phenotypic variation that the main epistasis effect explained; PV (AAE): the phenotypic variation that the environmental interaction of epistasis effect explained
